# Supplementary material for: Randomized Trial to Improve Primary Care Patient Management and Patient Outcomes Using a Drug–Drug Interaction Test: Confirmation of the DECART Simulated Patient Clinical Utility Trial Results
Source: MDPI journal article supplement (doi:10.3390/diagnostics11071266), 2021-07-15
Supplement: s1 [file s1]

**Supplementary Table S1.** List of Substances Detected by DDI Testing\*.

**ANTIARRHYTHMICS**

Amiodarone

Quinidine

Ranolazine

**ANTIDEPRESSANTS AND ANTIPSYCHOTICS**

Amitriptyline

Aripiprazole

Asenapine

Bupropion

Chlorpromazine

Citalopram/Escitalopram

Clomipramine

Desipramine

Desvenlafaxine

Doxepin

Duloxetine

Fluoxetine

Fluphenazine

Fluvoxamine

Haloperidol

Iloperidone

Nefazodone

Nortriptyline

Olanzapine

Paliperidone

Paroxetine

Perphenazine

Quetiapine

Risperidone

Sertraline

Thioridazine

Trazodone

Venlafaxine

**ANTIEMETICS AND GASTRIC REFLUX**

Cimetidine

Esomeprazole/Omeprazole

Famotidine

Lansoprazole

Metoclopramide

Ondansetron

Promethazine

Ranitidine

**ANTIEPILEPTICS**

Carbamazepine

Clobazam

Lamotrigine

Oxcarbazepine

Phenobarbital

Phenytoin

Primidone

**ANTIHYPERTENSIVES**

Amlodipine  
Atenolol  
Carvedilol  
Diltiazem  
Labetalol  
Metoprolol  
Nebivolol  
Nifedipine  
Propranolol  
Timolol  
Verapamil

**ANTIMICROBIALS AND ANTIRETROVIRALS**

Acyclovir/Valacyclovir  
Atazanavir  
Azithromycin  
Chloroquine  
Ciprofloxacin  
Clarithromycin  
Cobicistat  
Darunavir  
Delavirdine  
Efavirenz  
Erythromycin  
Etravirine  
Fluconazole  
Fosamprenavir  
Indinavir  
Itraconazole  
Ketoconazole  
Levofloxacin/Ofloxacin  
Metronidazole  
Nelfinavir  
Nevirapine  
Posaconazole  
Quinine  
Rifabutin  
Rifampin  
Rifapentine  
Ritonavir  
Saquinavir  
Terbinafine  
Tipranavir  
Voriconazole

**ANTI-PARKINSON AGENTS**

Carbidopa/Levodopa  
Ropinirole

**ANTITHROMBOTICS**

Apixaban  
Clopidogrel  
Rivaroxaban  
Warfarin

**CHEMOTHERAPEUTIC AGENTS**

Abiraterone  
Anastrozole  
Doxorubicin  
Enzalutamide  
Nilotinib  
Pazopanib

#### **COGNITIVE ENHANCEMENT**

Atomoxetine  
Donepezil  
Guanfacine  
Memantine

#### **FOODS AND SUPPLEMENTS**

Grapefruit Furanocoumarins  
Kava  
St. John's wort

#### **INHALED CORTICOSTEROIDS AND BETA AGONISTS**

Albuterol  
Formoterol  
Salmeterol

#### **MISCELLANEOUS**

Alcohol  
Atorvastatin  
Avanafil  
Baclofen  
Butalbital  
Canagliflozin  
Cyclobenzaprine  
Hydroxyzine  
Linagliptin  
Lorcaserin  
Methadone  
Methocarbamol  
Methotrexate  
Mirabegron  
Pioglitazone  
Pseudoephedrine  
Sumatriptan  
Tizanidine  
Zileuton

#### **STEROIDS AND HORMONES**

Dexamethasone  
Methylprednisolone  
Prednisone

\*Complete list as provided to intervention physicians.
